# Supplementary material for: Ageing-associated effects of a long-term dietary modulation of four trace elements in mice
Source: PubMed Central journal article supplement — Redox Biol. 2021 Jul 27;46:102083. doi: 10.1016/j.redox.2021.102083 (PMC8358688; doi:10.1016/j.redox.2021.102083), 2021-07-27
Supplement: mmc1.pdf [file mmc1.pdf]

# Aging-associated effects of a long-term dietary modulation of four trace elements in mice

– Figures and Tables Supporting Information –

## Authors

Viktoria K. Wandt<sup>a,b,#</sup>, Nicola Winkelbeiner<sup>a,b,#</sup>, Kristina Lossow<sup>b,c,d</sup>, Johannes F. Kopp<sup>a,b</sup>, Maria Schwarz<sup>b,c</sup>, Wiebke Alker<sup>b,e</sup>, Merle M. Nicolai<sup>f</sup>, Luise Simon<sup>a,b</sup>, Caroline Dietzel<sup>e</sup>, Barbara Hertel<sup>a</sup>, Gabriele Pohl<sup>a</sup>, Franziska Ebert<sup>a,b</sup>, Lutz Schomburg<sup>b,g</sup>, Julia Bornhorst<sup>b,f</sup>, Hajo Haase<sup>b,e</sup>, Anna P. Kipp<sup>b,c,\*</sup> and Tanja Schwerdtle<sup>a,b,h,\*</sup>

## Affiliations

<sup>a</sup>Department of Food Chemistry, Institute of Nutritional Science, University of Potsdam, Arthur-Scheunert-Allee 114-116, 14558 Nuthetal, Germany

<sup>b</sup>TraceAge – DFG Research Unit on Interactions of Essential Trace Elements in Healthy and Diseased Elderly (FOR 2558), Berlin-Potsdam-Jena-Wuppertal, Germany

<sup>c</sup>Department of Molecular Nutritional Physiology, Institute of Nutritional Sciences, Friedrich Schiller University Jena, Dornburger Str. 24, 07743 Jena, Germany

<sup>d</sup>German Institute of Human Nutrition, Arthur-Scheunert-Allee 114-116, 14558 Nuthetal, Germany

<sup>e</sup>Chair of Food Chemistry and Toxicology, Technische Universität Berlin, Straße des 17. Juni 135, 10623 Berlin, Germany

<sup>f</sup>Food Chemistry, Faculty of Mathematics and Natural Sciences, University of Wuppertal, Gaußstr. 20, 42119 Wuppertal, Germany

<sup>g</sup>Institute for Experimental Endocrinology, Charité – Universitätsmedizin Berlin, corporate member of Freie Universität Berlin, Humboldt Universität zu Berlin, and Berlin Institute of Health, Augustenburger Platz 1, 13353 Berlin, Germany

<sup>h</sup>German Federal Institute for Risk Assessment (BfR), Max-Dohrn-Str. 8-10, 10589 Berlin, Germany

<sup>#</sup>Shared first authorship

<sup>¥</sup>Authors contributed equally

\*Corresponding author address: Tanja Schwerdtle, Institute of Nutritional Science, University of Potsdam, Arthur-Scheunert-Allee 114-116, 14558 Nuthetal, Germany, phone: +49-33200 /88-5528, fax: +49-33200/88-5573, e-mail: tanja.schwerdtle@uni-potsdam.de

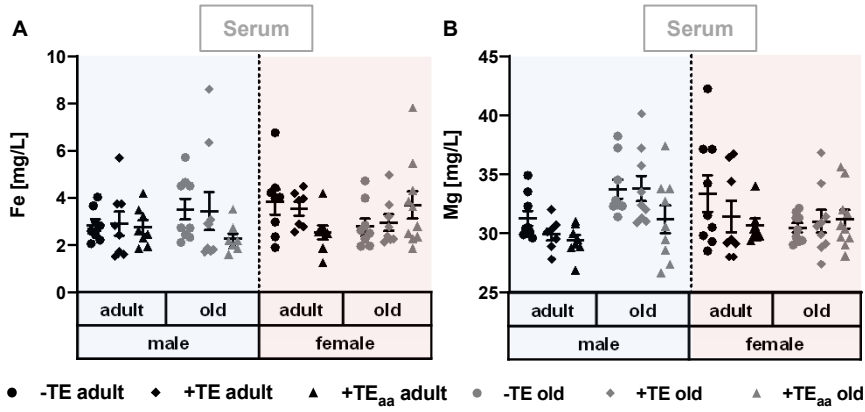

**Supplementary Information Figure 1. Changes in murine serum element concentrations.** Murine serum element concentrations were determined adult (30 weeks) and old (66 weeks) male and female C57BL/6Jrj mice ( $n = 8-10$ ) receiving a -TE, +TE, or +TE<sub>aa</sub> diet for 26 weeks. Total serum Fe (A) and Mn (B) concentrations were analysed by ICP-MS/MS. Statistical testing based on Three-Way ANOVA and Bonferroni's post-test with \*  $p < 0.05$ , \*\*  $p < 0.01$ , \*\*\*  $p < 0.001$ .

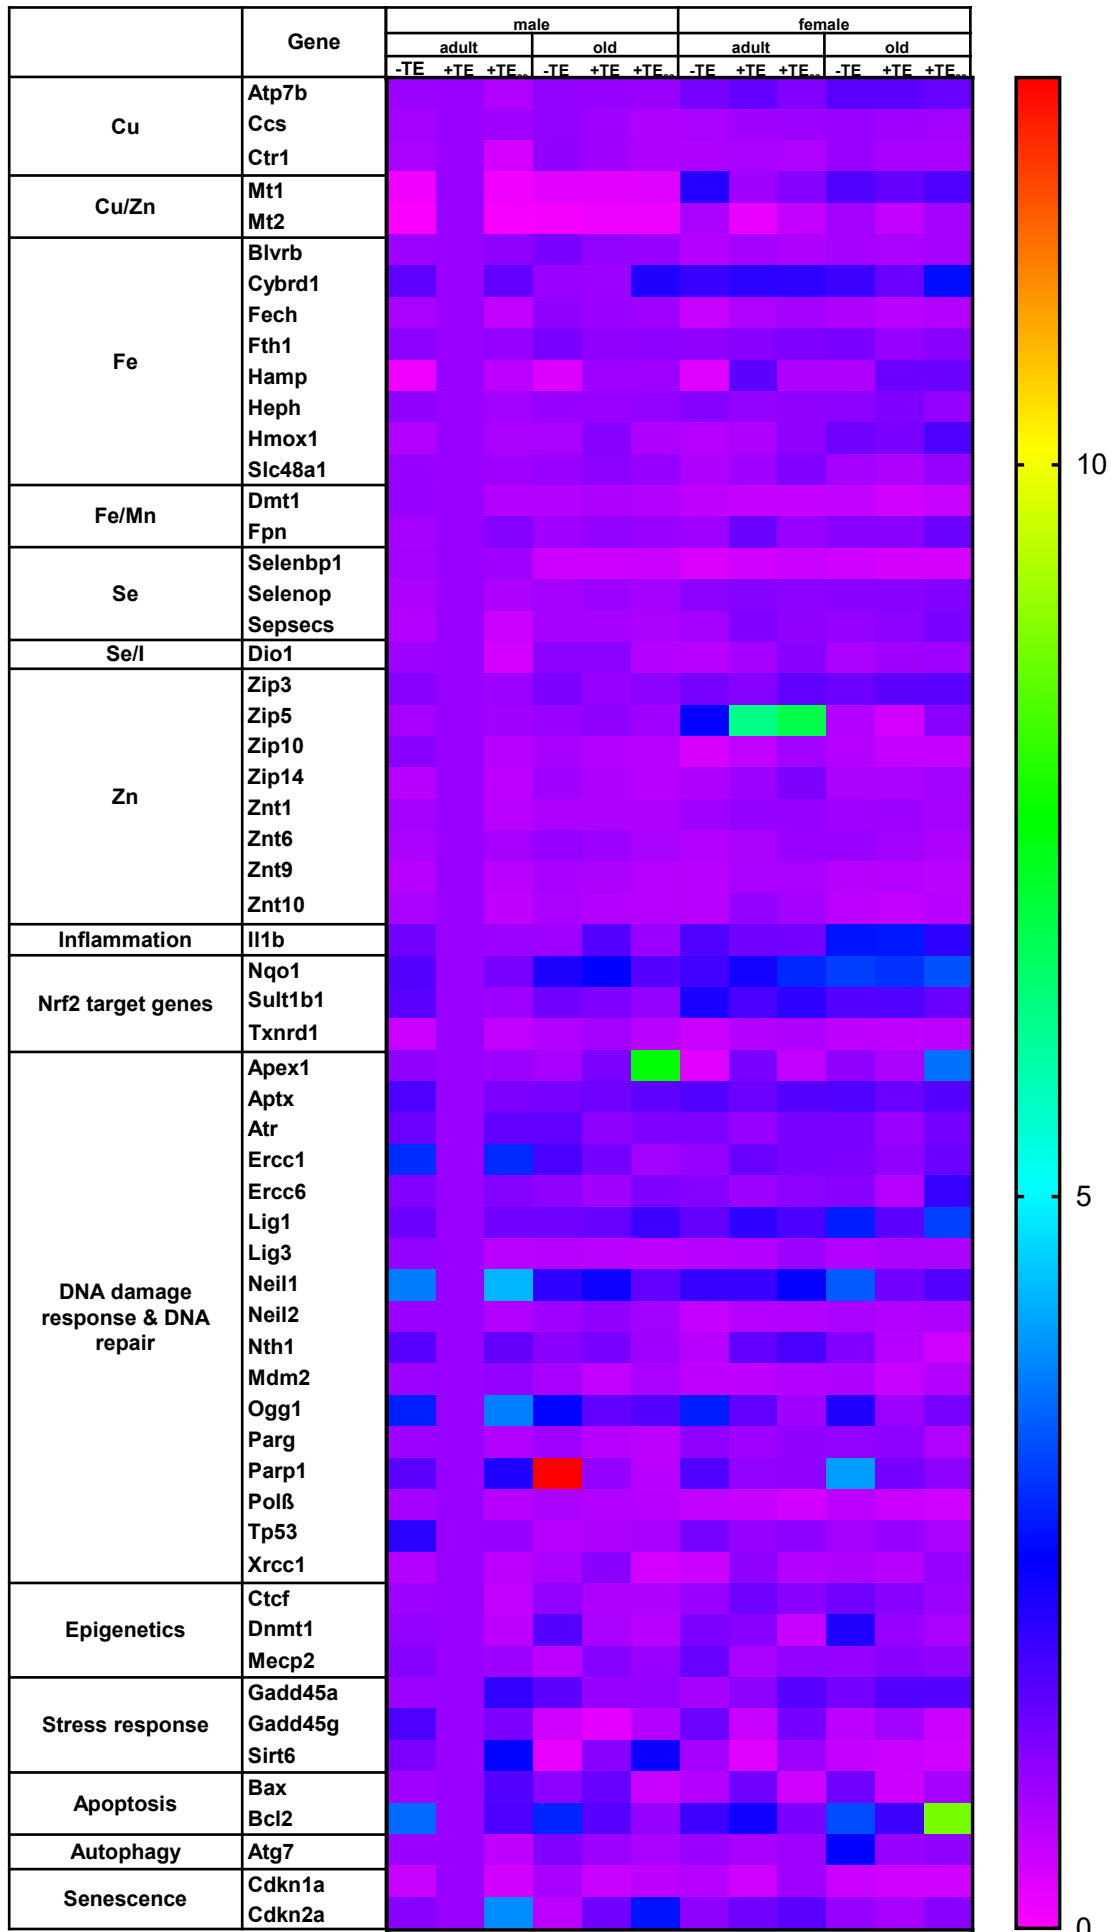

**Supplementary Figure 2. Quantitative Real Time-PCR array screening of TE-, DNA damage response-, and DNA repair-related gene expression in murine liver.** Relative expression level of selected genes related to TE homeostasis, DNA damage response, DNA repair mechanisms, stress response, epigenetics, cell death, as well as senescence in the liver of adult (30 weeks) and old (66 weeks) male and female C57BL/6Jrj mice (n = 8-10) receiving a -TE, +TE, or +TE<sub>aa</sub> diet for 26 weeks. Expression levels were normalised to a composite factor based on the house keeper genes Hprt and Rpl13a. Finally, variances are expressed as fold changes compared to +TE male adults (mean +TE male adult = 1).

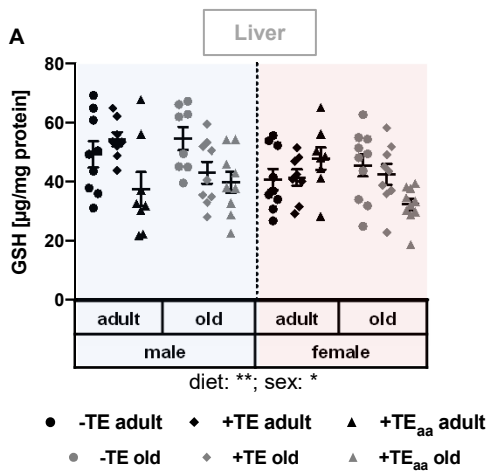

**Supplementary Information Figure 3. Changes in further analysed markers indicative for redox status in murine liver.** Gsh level were analysed in liver tissue of adult (30 weeks) and old (66 weeks) male and female C57BL/6Jrj mice (n = 8-10) receiving a -TE, +TE, or +TE<sub>aa</sub> diet for 26 weeks. GSH levels were quantified by HPLC-qTOF. Statistical testing based on Three-Way ANOVA and Bonferroni's post-test with \* p < 0.05, \*\* p < 0.01, \*\*\* p < 0.001.

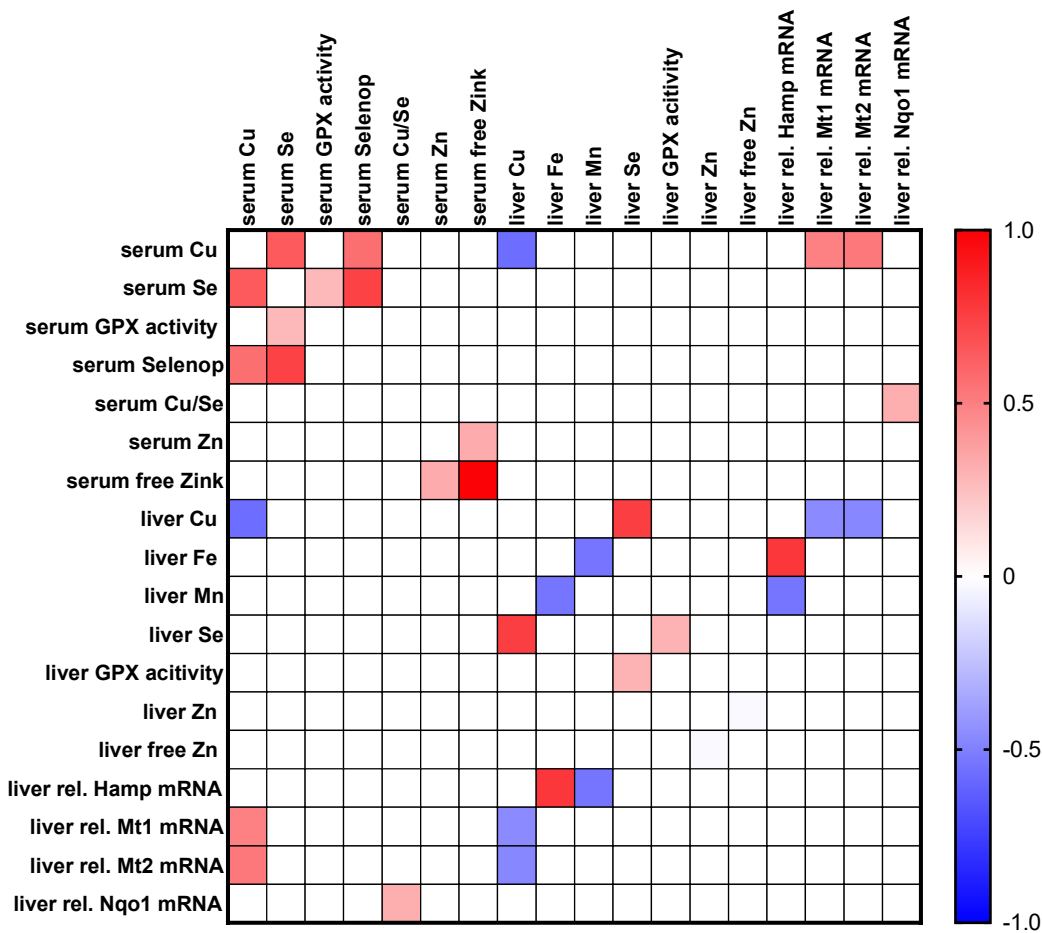

**Supplementary Information Figure 4. Heatmap among selected serum and hepatic TE concentrations and biomarkers, TE-related genes and redox markers in liver based on Spearman's correlation.** Serum and hepatic TE concentrations of Cu, Fe, Mn, Se, and Zn were analysed via ICP-MS/MS and on the basis of TE levels Cu/Se ratio was calculated. While Selenop concentrations were determined using, an affinity-HPLC-ICP-MS/MS, GPX activity was evaluated by a NADPH-consuming glutathione reductase coupled assay. Additionally, free Zn concentrations in liver and serum were analysed using a fluorescent probe, whereas relative mRNA expression of Hamp, Mt1, Mt2, and Nqo1 were determined by qRT-PCR analysis. Hepatic transcription levels were normalised to a composite factor based on the house keeper genes Hprt and Rpl13a. Finally, variances are expressed as fold changes compared to +TE male adults (mean +TE male adult = 1). Correlation coefficients vary between - 1 (blue) and 1 (red), indicated by colored changes.



| Parameter         | Unit | Male        |             |                   |               |             |                   |             |             |                   |             |             |                   | Statistics       |                  |                  |              |              |              |                  |
|-------------------|------|-------------|-------------|-------------------|---------------|-------------|-------------------|-------------|-------------|-------------------|-------------|-------------|-------------------|------------------|------------------|------------------|--------------|--------------|--------------|------------------|
|                   |      | Adult       |             |                   |               | Old         |                   |             |             | Female            |             |             |                   | Diet             | Sex              | Age              | Diet x sex   | Diet x age   | Sex x age    | Diet x sex x age |
|                   |      | -TE         | +TE         | +TE <sub>aa</sub> | -TE           | +TE         | +TE <sub>aa</sub> | -TE         | +TE         | +TE <sub>aa</sub> | -TE         | +TE         | +TE <sub>aa</sub> |                  |                  |                  |              |              |              |                  |
| Polβ protein      |      | 1.13 ± 0.77 | 3.82 ± 3.00 | 1.37 ± 0.50       | 1.46 ± 0.43   | 1.40 ± 0.68 | 1.35 ± 0.84       | 1.38 ± 0.19 | 3.32 ± 3.1  | 2.37 ± 1.72       | 1.19 ± 0.31 | 2.07 ± 1.01 | 1.19 ± 0.32       | <b>0.009</b>     | 0.704            | <b>0.027</b>     | 0.836        | 0.120        | 0.877        | 0.405            |
| rel. Apex1 mRNA   |      | 1.11 ± 1.06 | 1 ± 0.54    | 0.96 ± 0.78       | 0.87 ± 0.5    | 1.28 ± 0.64 | 7.55 ± 14.55      | 0.29 ± 0.03 | 1.29 ± 0.88 | 0.6 ± 0.04        | 1.09 ± 1.24 | 0.82 ± 0.29 | 3.64 ± 5.01       | 0.085            | 0.204            | <b>0.018</b>     | 0.840        | <b>0.023</b> | 0.741        | 0.139            |
| rel. Aptx mRNA    |      | 1.76 ± 0.87 | 1 ± 0.28    | 1.28 ± 0.52       | 1.34 ± 0.26   | 1.42 ± 0.46 | 1.58 ± 0.99       | 1.71 ± 0.59 | 1.46 ± 0.34 | 1.68 ± 0.38       | 1.74 ± 0.29 | 1.49 ± 0.2  | 1.67 ± 0.37       | 0.099            | <b>0.048</b>     | 0.611            | 0.945        | 0.277        | 0.712        | 0.246            |
| rel. Atg7 mRNA    |      | 1 ± 0.38    | 1 ± 0.21    | 0.63 ± 0.26       | 1.24 ± 0.19   | 0.98 ± 0.47 | 0.84 ± 0.48       | 1 ± 0.33    | 0.86 ± 0.22 | 0.93 ± 0.24       | 2.51 ± 2.49 | 1.01 ± 0.31 | 1.09 ± 0.42       | <b>0.031</b>     | 0.170            | 0.067            | 0.336        | 0.157        | 0.278        | 0.267            |
| rel. Atr mRNA     |      | 1.49 ± 0.66 | 1 ± 0.39    | 1.56 ± 0.24       | 1.55 ± 0.55   | 1.12 ± 0.38 | 1.26 ± 0.88       | 1.26 ± 0.57 | 1.05 ± 0.51 | 1.3 ± 0.23        | 1.32 ± 0.5  | 0.99 ± 0.3  | 1.35 ± 0.57       | <b>0.018</b>     | 0.303            | 0.924            | 0.763        | 0.765        | 0.797        | 0.619            |
| rel. Bax mRNA     |      | 0.94 ± 0.55 | 1 ± 0.39    | 1.69 ± 1.1        | 1.13 ± 0.51   | 1.5 ± 0.63  | 0.55 ± 0.16       | 0.74 ± 0.38 | 1.42 ± 0.77 | 0.46 ± 0.14       | 1.41 ± 1.07 | 0.51 ± 0.12 | 0.9 ± 0.66        | 0.468            | 0.115            | 0.771            | 0.366        | 0.063        | 0.448        | <b>&lt;0.001</b> |
| rel. Bcl2 mRNA    |      | 3.57 ± 1.37 | 1 ± 0.53    | 1.76 ± 0.77       | 2.88 ± 0.7    | 1.66 ± 0.69 | 1.05 ± 0.46       | 1.89 ± 0.61 | 2.36 ± 1.85 | 1.3 ± 0.42        | 3.27 ± 1.8  | 1.92 ± 0.5  | 8.77 ± 9.38       | 0.172            | 0.065            | 0.063            | <b>0.036</b> | 0.088        | <b>0.027</b> | <b>0.019</b>     |
| rel. Cdkn1a mRNA  |      | 0.56 ± 0.24 | 1 ± 0.62    | 0.44 ± 0.4        | 0.86 ± 0.9    | 0.55 ± 0.53 | 0.65 ± 0.66       | 0.72 ± 0.64 | 0.48 ± 0.31 | 0.94 ± 1.06       | 0.53 ± 0.46 | 0.47 ± 0.18 | 0.46 ± 0.23       | 0.236            | 0.473            | 0.334            | 0.244        | 0.533        | 0.927        | 0.196            |
| rel. Cdkn2a mRNA  |      | 1.17 ± 0.67 | 1 ± 0.8     | 3.93 ± 4.4        | 0.66 ± 0.34   | 1.41 ± 1.42 | 2.7 ± 1.66        | 1.12 ± 0.72 | 1.42 ± 1.28 | 1.62 ± 0.84       | 1.04 ± 0.45 | 0.85 ± 0.59 | 1.17 ± 1.24       | <b>0.008</b>     | 0.089            | 0.242            | <b>0.062</b> | 0.755        | 0.994        | 0.514            |
| rel. Ctcf mRNA    |      | 0.97 ± 0.19 | 1 ± 0.28    | 0.61 ± 0.26       | 1.08 ± 0.32   | 0.8 ± 0.14  | 0.81 ± 0.32       | 1 ± 0.26    | 1.42 ± 0.74 | 1.15 ± 0.34       | 1.41 ± 0.76 | 1.17 ± 0.33 | 0.98 ± 0.23       | 0.064            | <b>0.001</b>     | 0.436            | 0.664        | 0.189        | 0.769        | 0.154            |
| rel. Dnmt1 mRNA   |      | 1.08 ± 0.47 | 1 ± 0.43    | 0.64 ± 0.6        | 1.67 ± 1.24   | 0.84 ± 0.55 | 0.69 ± 0.33       | 1.27 ± 0.66 | 1.17 ± 0.93 | 0.54 ± 0.32       | 2.19 ± 1.61 | 1.03 ± 0.58 | 0.84 ± 0.33       | <b>&lt;0.001</b> | 0.189            | 0.086            | 0.848        | 0.100        | 0.703        | 0.914            |
| rel. Ercc1 mRNA   |      | 2.97 ± 2.61 | 1 ± 0.34    | 2.92 ± 3.82       | 1.78 ± 0.53   | 1.35 ± 0.31 | 0.92 ± 0.38       | 1.05 ± 0.28 | 1.48 ± 0.49 | 1.3 ± 0.48        | 1.28 ± 0.64 | 1.1 ± 0.13  | 1.46 ± 0.58       | 0.351            | 0.083            | 0.132            | 0.230        | 0.497        | 0.129        | 0.152            |
| rel. Ercc6 mRNA   |      | 1.23 ± 0.37 | 1 ± 0.27    | 1.21 ± 0.44       | 1.09 ± 0.35   | 0.92 ± 0.35 | 1.26 ± 0.55       | 1.2 ± 0.41  | 0.97 ± 0.36 | 1.14 ± 0.43       | 1.18 ± 0.26 | 0.73 ± 0.22 | 2 ± 2.18          | <b>0.012</b>     | 0.558            | 0.475            | 0.790        | 0.609        | 0.940        | 0.805            |
| rel. Gadd45a mRNA |      | 0.97 ± 0.58 | 1 ± 0.39    | 2.03 ± 1.72       | 1.59 ± 0.78   | 1.03 ± 0.5  | 1.05 ± 0.44       | 0.87 ± 0.52 | 1.11 ± 0.5  | 1.66 ± 0.6        | 1.37 ± 0.5  | 1.7 ± 0.53  | 1.67 ± 0.79       | 0.078            | 0.471            | 0.450            | 0.377        | <b>0.028</b> | 0.152        | 0.360            |
| rel. Gadd45g mRNA |      | 1.75 ± 1.38 | 1 ± 0.79    | 1.28 ± 1.17       | 0.46 ± 0.31   | 0.28 ± 0.06 | 0.74 ± 0.53       | 1.44 ± 1.23 | 0.55 ± 0.26 | 1.36 ± 0.83       | 0.66 ± 0.36 | 0.92 ± 0.59 | 0.52 ± 0.28       | 0.180            | 0.953            | <b>&lt;0.001</b> | 0.919        | 0.144        | 0.216        | 0.274            |
| rel. Lig1 mRNA    |      | 1.46 ± 0.54 | 1 ± 0.27    | 1.39 ± 0.48       | 1.42 ± 0.5    | 1.5 ± 0.47  | 1.92 ± 1.4        | 1.52 ± 0.81 | 2.07 ± 0.34 | 1.78 ± 0.56       | 2.81 ± 0.85 | 1.61 ± 0.21 | 3.17 ± 1.89       | 0.099            | <b>&lt;0.001</b> | 0.888            | 0.145        | 0.291        | 0.047        |                  |
| rel. Lig3 mRNA    |      | 1.05 ± 0.71 | 1 ± 0.35    | 0.68 ± 0.31       | 0.72 ± 0.23   | 0.68 ± 0.11 | 0.64 ± 0.19       | 0.71 ± 0.31 | 0.74 ± 0.13 | 0.98 ± 0.27       | 0.74 ± 0.22 | 0.82 ± 0.22 | 0.82 ± 0.17       | 0.254            | 0.512            | 0.243            | <b>0.012</b> | 0.367        | 0.092        | 0.090            |
| rel. Mdm2 mRNA    |      | 0.96 ± 0.38 | 1 ± 0.19    | 1.07 ± 0.21       | 0.86 ± 0.16   | 0.61 ± 0.27 | 0.85 ± 0.45       | 0.62 ± 0.32 | 0.64 ± 0.31 | 0.74 ± 0.18       | 0.78 ± 0.24 | 0.54 ± 0.11 | 0.74 ± 0.3        | 0.135            | <b>&lt;0.001</b> | 0.079            | 0.997        | 0.190        | <b>0.039</b> | 0.972            |
| rel. Mecp2 mRNA   |      | 1.19 ± 0.23 | 1 ± 0.13    | 0.97 ± 0.39       | 0.66 ± 0.27   | 1.21 ± 0.36 | 1.01 ± 0.45       | 1.51 ± 0.46 | 0.84 ± 0.36 | 1.06 ± 0.32       | 1.05 ± 0.26 | 1.16 ± 0.67 | 1.1 ± 0.55        | 0.809            | 0.204            | 0.472            | 0.119        | <b>0.003</b> | 0.744        | 0.969            |
| rel. Neil1 mRNA   |      | 3.77 ± 3.8  | 1 ± 0.83    | 4.34 ± 1.85       | 2.07 ± 1.14   | 2.41 ± 1.52 | 1.53 ± 0.75       | 2 ± 1.19    | 1.97 ± 0.43 | 2.47 ± 0.97       | 3.42 ± 1.68 | 1.4 ± 0.45  | 1.7 ± 0.74        | <b>0.038</b>     | 0.323            | 0.168            | 0.637        | <b>0.050</b> | 0.147        | <b>0.014</b>     |
| rel. Neil2 mRNA   |      | 0.99 ± 0.85 | 1 ± 0.36    | 0.76 ± 0.39       | 0.95 ± 0.54   | 1.09 ± 0.72 | 0.91 ± 0.53       | 0.56 ± 0.45 | 0.73 ± 0.48 | 0.76 ± 0.33       | 0.83 ± 0.55 | 0.76 ± 0.38 | 0.79 ± 0.61       | 0.809            | 0.071            | 0.449            | 0.675        | 0.981        | 0.854        | 0.703            |
| rel. Nth1 mRNA    |      | 1.65 ± 0.84 | 1 ± 0.4     | 1.52 ± 0.98       | 1.17 ± 0.57   | 1.34 ± 0.6  | 0.95 ± 0.5        | 0.71 ± 0.15 | 1.55 ± 1.23 | 1.79 ± 1.65       | 1.23 ± 1.03 | 0.72 ± 0.12 | 0.49 ± 0.26       | 0.986            | 0.332            | 0.051            | 0.661        | 0.117        | 0.444        | 0.062            |
| rel. Ogg1 mRNA    |      | 2.84 ± 3.19 | 1 ± 0.84    | 3.8 ± 3.4         | 2.56 ± 2.52   | 1.55 ± 1.24 | 1.7 ± 1.46        | 2.8 ± 2.3   | 1.56 ± 0.56 | 0.92 ± 0.41       | 2.19 ± 1.41 | 0.97 ± 0.55 | 1.33 ± 0.68       | <b>0.049</b>     | 0.153            | 0.308            | 0.228        | 0.727        | 0.688        | 0.178            |
| rel. Parg mRNA    |      | 0.97 ± 0.2  | 1 ± 0.33    | 0.75 ± 0.43       | 0.94 ± 0.39   | 0.71 ± 0.18 | 0.65 ± 0.38       | 1.09 ± 0.51 | 0.95 ± 0.36 | 1.11 ± 0.17       | 1.07 ± 0.42 | 1.12 ± 0.31 | 0.78 ± 0.23       | 0.102            | <b>0.019</b>     | 0.199            | 0.821        | 0.542        | 0.588        | 0.183            |
| rel. Parp1 mRNA   |      | 1.63 ± 0.61 | 1 ± 0.37    | 2.22 ± 1.24       | 12.65 ± 10.24 | 1.06 ± 0.44 | 0.69 ± 0.16       | 1.74 ± 0.87 | 1.08 ± 0.02 | 1.1 ± 0.6         | 4.09 ± 3.66 | 1.37 ± 0.4  | 1.14 ± 0.2        | <b>0.002</b>     | <b>0.037</b>     | <b>0.007</b>     | 0.179        | <b>0.004</b> | 0.078        | 0.066            |
| rel. Polβ mRNA    |      | 0.88 ± 0.19 | 1 ± 0.23    | 0.69 ± 0.42       | 0.83 ± 0.29   | 0.76 ± 0.32 | 0.72 ± 0.31       | 0.61 ± 0.15 | 0.57 ± 0.1  | 0.45 ± 0.12       | 0.66 ± 0.11 | 0.52 ± 0.07 | 0.48 ± 0.23       | <b>0.025</b>     | <b>&lt;0.001</b> | 0.437            | 0.625        | 0.339        | 0.338        | 0.762            |
| rel. Sirt6 mRNA   |      | 1.27 ± 1.58 | 1 ± 0.78    | 2.55 ± 1.59       | 0.23 ± 0.08   | 1.18 ± 0.95 | 2.41 ± 3.07       | 0.91 ± 0.53 | 0.31 ± 0.09 | 0.97 ± 0.42       | 0.57 ± 0.48 | 0.52 ± 0.07 | 0.47 ± 0.33       | <b>0.020</b>     | <b>0.004</b>     | 0.325            | <b>0.034</b> | 0.417        | 0.821        | <b>0.713</b>     |
| rel. Tp53 mRNA    |      | 2.11 ± 3.2  | 1 ± 0.37    | 1.01 ± 0.28       | 0.71 ± 0.29   | 0.79 ± 0.29 | 0.86 ± 0.44       | 1.34 ± 0.69 | 1.05 ± 0.42 | 1.12 ± 0.08       | 0.9 ± 0.21  | 1.03 ± 0.1  | 0.84 ± 0.25       | 0.255            | <b>0.015</b>     | <b>0.038</b>     | 0.283        | 0.695        | 0.658        | 0.403            |
| rel. Xrcc1 mRNA   |      | 0.74 ± 0.43 | 1 ± 1.01    | 0.67 ± 0.31       | 0.83 ± 0.34   | 1.15 ± 0.52 | 0.43 ± 0.24       | 0.51 ± 0.1  | 1.11 ± 0.78 | 0.74 ± 0.44       | 0.8 ± 0.61  | 0.7 ± 0.11  | 1.04 ± 0.57       | 0.123            | 0.910            | 0.798            | 0.152        | 0.576        | 0.803        | 0.172            |

Supplementary Information Table 2. Oligonucleotide sequences (5'→3')

| Gen, encoded protein                                                                         | RefSeq-ID      | Sequence 5'→3'                                      | Modified melting temperature                                                       |
|----------------------------------------------------------------------------------------------|----------------|-----------------------------------------------------|------------------------------------------------------------------------------------|
| Apex1, apurinic/aprimidinic endonuclease 1                                                   | NM_009687.2    | CCCTCCAGATCAGAAAACCTC<br>AGGCAGCTCTTCAGTTGAG        | melting temperature 55°C                                                           |
| Aptx, aprataxin                                                                              | NM_025545.4    | CTGCGCTTCCGATTGGGCTA<br>GTCACCTCTGCCGGCTTCCTG       |                                                                                    |
| Atg7, autophagy related 7                                                                    | NM_001253717.1 | CAAGTTGCAGTTGCCCCCT<br>GGGCAGACCAGCAGAGTAC          |                                                                                    |
| Atp7b, ATPase, Cu <sup>++</sup> transporting, beta polypeptide                               | NM_007511.2    | CAGATGTCAAAGGCTCCCAATTCAG<br>CCAATGACGATCCACACCACC  |                                                                                    |
| Atr, ataxia telangiectasia and Rad3 related                                                  | NM_019864.1    | CCGTCTCTGGAGCGGCATAC<br>GGCAAGGAGCACTTGGGAGT        |                                                                                    |
| Bax, BCL2-associated X protein                                                               | NM_007527.3    | CGGGTGGCAGCTGACATGTTT<br>CCAGCCACCCTGGTCTTGAT       |                                                                                    |
| Bcl2, B cell leukemia/lymphoma 2                                                             | NM_009741.5    | GGTGGGTGATGTGTGGAG<br>CGCATGCTGGGGCCATATAGTT        |                                                                                    |
| Blvrb, biliverdin reductase B                                                                | NM_144923      | TGGCAACGACCTCAGTCCCA<br>GTAGGAAGGCCGAGGTGCAG        |                                                                                    |
| Ccs, copper chaperone for superoxide dismutase                                               | NM_016892.3    | GATGTGATTGCGCCAGCCT<br>CACAGCCAACCTCTTCCCA          |                                                                                    |
| Cdkn1a, cyclin-dependent kinase inhibitor 1A (P21)                                           | NM_001111099.2 | GACAGTGAGCAGTTGCGCC<br>CTCAGACACCAGAGTGCAAGAC       | melting temperature 55°C                                                           |
| Cdkn2a, cyclin dependent kinase inhibitor 2A                                                 | NM_009877.2    | GGGTTTTCTTGGTGAAGTTGCTG<br>TTGCCATCATCATCACTGGT     | melting temperature 55°C                                                           |
| Ctcf, CCCTC-binding factor                                                                   | NM_181322.3    | CTGCAGCCACTGCGACAAGA<br>GCCATCTGGACCAGCACAGTT       |                                                                                    |
| Ctr1, solute carrier family 31, member 1                                                     | NM_175090.4    | ACCATGCCACCTCACCACCA<br>GCTCCAGCCATTTCTCCAGGT       |                                                                                    |
| Cybrd1, cytochrome b reductase 1                                                             | NM_028593.2    | CAGGGCATCGCCATCATCTGT<br>GGTACTCAAACACAGCCACCAC     |                                                                                    |
| Dio1, deiodinase, iodothyronine, type I                                                      | NM_007860.3    | GGGATTTCAITCAAGGCAGCAGG<br>TGTGGAGGGCAAAGTCATCTACGA |                                                                                    |
| Dmt1, solute carrier family 11 (proton-coupled divalent metal ion transporters), member 2    | NM_001146161.1 | CTCAGCCATCGCCATCAATCTC<br>TTCCGCAAGCCATATTTGCCA     |                                                                                    |
| Dnmt1, DNA methyltransferase (cytosine-5) 1                                                  | NM_001199432.1 | GGAGTCACACACCGTTCCCG<br>CACACTCGGGCCTTTGGT          |                                                                                    |
| Ercc1, excision repair cross-complementing rodent repair deficiency, complementation group 1 | NM_007948.2    | GAACTTCGCCCTTCGTGTGC<br>CAGGGTGCAGTCAGCCAAGA        |                                                                                    |
| Ercc6, excision repair cross-complementing rodent repair deficiency, complementation group 6 | NM_001081221.2 | GGGACCACCACCATAGCGTCT<br>GTTGGCACCGGTCAAGTTCA       |                                                                                    |
| Fech, ferrochelatase                                                                         | NM_007998.4    | TCCAGAGGAGAAGAGGAGGAG<br>GTACTGGACCAACCTTGGACTG     |                                                                                    |
| Fpn, ferroportin, solute carrier family 40 (iron-regulated transporter), member 1            | NM_016917.2    | CTGGTGGTTTCAAGATGTCCGT<br>AGCAGACAGTAAGGACCCATCCA   |                                                                                    |
| Fth1, ferritin heavy polypeptide 1                                                           | NM_010239.2    | CGCCGAAGACTACCACAGGA<br>TTCTTCAGAGCCATCATCTCGG      |                                                                                    |
| Gadd45a, growth arrest and DNA-damage-inducible 45 alpha                                     | NM_007836.1    | AGAAGACCCGAAAGGATGGACAC<br>CACGGATGAGGGTGAAATGGAT   | melting temperature 55°C                                                           |
| Gadd45g, growth arrest and DNA-damage-inducible 45 gamma                                     | NM_011817.2    | CGGGAAAGCACTGCACGAAC<br>CACATTGTCAAGGTCCACATTAG     |                                                                                    |
| Hamp, hepcidin antimicrobial peptide                                                         | NM_032541.1    | AAGCAGGGCAGACATTGGCA<br>TGCAACAGATAACCACACTGGGA     |                                                                                    |
| Heph, hephaestin                                                                             | NM_010417.2    | CTCTTGCTCCATGGACCCAC<br>ATCTGGGCCACTTCTCGCT         |                                                                                    |
| Hmox1, heme oxygenase (decycling) 1                                                          | NM_010442.1    | CCTGGTGCAGATACTGCC<br>GAAGCTGAGAGTGAGGACCCA         |                                                                                    |
| Hprt1, hypoxanthine guanine phosphoribosyl transferase                                       | NM_013556.2    | GCAGTCCCAGCGTCTGTG<br>GGCTCCCATCTCCTTCAT            |                                                                                    |
| Il1b, interleukin 1 beta                                                                     | NM_008361.3    | TTGAAGAAGAGCCATCCTCTGTG<br>TTGTTCACTCGGAGCCTGTAGTG  |                                                                                    |
| Lig1, ligase I                                                                               | NM_001083188.2 | CACCCCCAAAGTCCAGAAGCC<br>GGGGGAGCTGCAGTTGAAGAC      |                                                                                    |
| Lig3, ligase III                                                                             | NM_010716.3    | CCTCGGAAGTTCTCGGCTTTT<br>CCGGAACTCTCTAGCAGACA       |                                                                                    |
| Mdm2, transformed mouse 3T3 cell double minute 2                                             | NM_001288586.2 | CAGAGACGCCCTGCATCAG<br>GAGAGCTCGTGCCTTCGTC          |                                                                                    |
| Mecp2, methyl CpG binding protein 2                                                          | NM_010788.4    | TCCATTATCCGTGACCGGGGA<br>GGTCCAAGGAGGTGTCTCCCA      |                                                                                    |
| Mt1, metallothionein 1                                                                       | NM_013602.3    | CTCCTGCAAGAAGAGCTGCTG<br>GCACAGCAGTGCACCTTGTG       |                                                                                    |
| Mt2, metallothionein 2                                                                       | NM_008630.2    | TCCTGTGCCTCCGATGGATC<br>TTGCAGATGCAGCCCTGGGA        |                                                                                    |
| Neil1, nei endonuclease VIII-like 1                                                          | NM_028347.3    | GCTTGCCCTTTGCTTCGTAGA<br>CACAGATGGCCGGTCAAAG        |                                                                                    |
| Neil2, nei endonuclease like 2                                                               | NM_201610.2    | CCCAGTGATTGAGCCACCTG<br>GAACCGAGAGAGGGGATGGA        |                                                                                    |
| Nqo1, NAD(P)H dehydrogenase, quinone 1                                                       | NM_008706.4    | ATGTACGACAACGGTCTTTCCAG<br>GATGCCACTCTGAATCGGCCA    |                                                                                    |
| Nth1, nth (endonuclease III)-like 1                                                          | NM_008743.2    | GATCGCTCGGAAGGTGTAG<br>GTTCTGGGGCTCCCAACGG          |                                                                                    |
| Ogg1, 8-oxoguanine DNA-glycosylase 1                                                         | NM_010957.4    | GTGACTACGGCTGGCATCC<br>AGGCTTGGTTGGCGAAGG           | 10 cycles melting temperature 55°C, followed by 45 cycles melting temperature 56°C |
| Parg, poly (ADP-ribose) glycohydrolase                                                       | NM_011960.3    | CACACGACCCAGAACTTGA<br>GTTGGCCCTCTGCTTCTCA          |                                                                                    |
| Parp1, poly (ADP-ribose) polymerase family, member 1                                         | NM_007415.3    | GGCAGCCTGATGTTGAGGTG<br>GCTACTCCGCTAAAAGTCCAC       | melting temperature 55°C                                                           |
| Polb, polymerase beta                                                                        | NM_011130.2    | GCGCAGAGTCGAGTGGAGAC<br>CCTTCTCGCTGGAAAGCTGG        |                                                                                    |
| Rpl13a, ribosomal protein L13a                                                               | NM_009438.5    | GTTCCGGCTGAAGCCTACCA<br>TTCCGTAACCTCAAGATCTGCT      |                                                                                    |
| Selenbp1, selenium binding protein 1                                                         | NM_009150.3    | CAGGTATCCACAGGTTGCCCA<br>ACGTAGATGCCGGAGGAGATGAG    |                                                                                    |
| Selenop, selenoprotein P                                                                     | NM_001042613.1 | CTCATCTATGACAGATGTGGCCGT<br>AAGACTCGTGAGATTGCAGTTCC |                                                                                    |
| Sepsecs, Sep (O-phosphoserine) tRNA:Sec (selenocysteine) tRNA synthase                       | NM_172490      | TCTAGAGCAGGGCAAGTGTCCA<br>AGCAACCAAAGCAGAGGCCA      |                                                                                    |
| Sirt6, sirtuin 6                                                                             | NM_181586.4    | ACGCGGATAAGGGCAAGTG<br>CTCCACACCTTGCCTTC            | melting temperature 55°C                                                           |
| Slc48a1, Slc48a1, solute carrier family 48 (heme transporter), member 1                      | NM_026353.4    | ATTGGCCATCACCCAGCATCAG<br>CTGATGTCGCCAAAGTCAGCC     |                                                                                    |
| Sult1b1, sulfotransferase family 1B, member 1                                                | NM_019878.3    | CTGCCACAGCAATGATGGA<br>GCATCAAATTGCTCAGITTTGGGTC    |                                                                                    |
| Trp53, transformation related protein 53                                                     | NM_001127233.1 | CACAGTCGGATATCAGCCTCG<br>CATGCAGTGAGGTGATGGCA       |                                                                                    |



| Gen, encoded protein                                                          | RefSeq-ID      | Sequence 5'→3'                                      | Modified melting temperature |
|-------------------------------------------------------------------------------|----------------|-----------------------------------------------------|------------------------------|
| Txnrd1, thioredoxin reductase 1                                               | NM_001042523.1 | AGCAGCTAAGGAGGCAGCCA<br>TTTCCAGCCATAGTTGCGCGAG      |                              |
| Xrcc1, X-ray repair complementing defective repair in chinese hamster cells 1 | NM_009532.5    | CAGAGGCTGACCTGCCAATCC<br>GTGATGACGAACTGGACCCGC      |                              |
| Zip3, solute carrier family 39 (zinc transporter), member 3 (Slc39a3)         | NM_134135      | CTGGGGTACGCCGTTCTG<br>GGGACGTGCTCTGTGTCCTT          |                              |
| Zip5, solute carrier family 39 (metal ion transporter), member 5 (Slc39a5)    | NM_028051      | GGGCAGCCTCATGTTTACCA<br>CCACATCAGCCGTCAGGAA         |                              |
| Zip10, solute carrier family 39 (zinc transporter), member 10 (Slc39a10)      | NM_172653      | TGGCTTACATAGGAATGCTCATAGG<br>TGCGAAGATCCAGAGTGTGATG |                              |
| Zip14, solute carrier family 39, member 14                                    | NM_144808      | GAGCCAACTGATAATCCATTGCT<br>GTCAACGGCCACATTTTCAA     |                              |
| Znt1, ZnT1, solute carrier family 30, member 1 (Slc30a1)                      | NM_009579      | CACGACTTACCCATTGCTCAAG<br>CTTTCACCAAGTGTGATATCGATT  |                              |
| Znt6, solute carrier family 30 (zinc transporter), member 6 (Slc30a6)         | NM_144798      | TCCCAGGACTCAGCAGTATCTT<br>GCCCCAGCAAGATCAATCAG      |                              |
| Znt9, solute carrier family 30 (zinc transporter), member 9 (Slc30a9)         | NM_178651      | GGAAGCCTTGAAGCTCTTGCCA<br>GGAACGTGGCTTTGTGTTTCCC    |                              |
| Znt10, solute carrier family 30, member 10 (Slc30a10)                         | NM_001033286   | ACTGGCAGTGCTACATTGACCC<br>CAGCTGGCTCATCAGCTCTTC     |                              |
